# Supplementary material for: Reaction of N-heterocyclic carbenes with 13-vertex closo-carboranes: synthesis and structural characterization of zwitterionic salts of 13-vertex nido-carboranes
Source: Royal Society of Chemistry journal article supplement (doi:10.1039/c4qo00287c), 2014-12-10
Supplement: c4qo00287c1.pdf [file c4qo00287c1.pdf]

# Supporting Information

## **Reaction of *N*-Heterocyclic Carbenes with 13-Vertex *closo*-Carboranes: Synthesis and Structural Characterization of Zwitterionic Salts of 13-Vertex *nido*-Carboranes**

Fangrui Zheng and Zuowei Xie\*

*Department of Chemistry, Center of Novel Functional Molecules and State Key Laboratory of  
Synthetic Chemistry, The Chinese University of Hong Kong, Shatin, New Territories, Hong Kong,  
China*

E-mail: [zxie@cuhk.edu.hk](mailto:zxie@cuhk.edu.hk)

### **Table of Contents**

|                      |      |
|----------------------|------|
| General Procedures   | S-2  |
| Experimental Section | S-2  |
| References           | S-18 |

**General Procedures.** All experiments were performed under an atmosphere of dry argon with the rigid exclusion of air and moisture using standard Schlenk or cannula techniques, or in a glovebox. All organic solvents were refluxed over sodium benzophenone ketyl for several days and freshly distilled prior to use. CH<sub>2</sub>Cl<sub>2</sub> was refluxed over CaH<sub>2</sub> for several days and distilled immediately before use. All chemicals were purchased from either Aldrich or Acros Chemical Co. and used as received unless otherwise noted. 1,2-(CH<sub>2</sub>)<sub>3</sub>-1,2-C<sub>2</sub>B<sub>11</sub>H<sub>11</sub>,<sup>1</sup> 1,2-(CH<sub>2</sub>)<sub>4</sub>-1,2-C<sub>2</sub>B<sub>11</sub>H<sub>11</sub>,<sup>2</sup> 1,2-(CH<sub>2</sub>)<sub>3</sub>-3-Ph-1,2-C<sub>2</sub>B<sub>11</sub>H<sub>10</sub>,<sup>1</sup> and 1,2-(CH<sub>2</sub>)<sub>4</sub>-3-Ph-1,2-C<sub>2</sub>B<sub>11</sub>H<sub>10</sub><sup>2</sup> were prepared according to literature methods. Infrared spectra were obtained from KBr pellets on a Perkin-Elmer 1600 Fourier transform spectrometer. <sup>1</sup>H NMR spectra were recorded on either a Bruker DPX 300 spectrometer at 300 MHz or a Bruker DPX 400 spectrometer at 400 MHz. <sup>13</sup>C{<sup>1</sup>H} NMR spectra were recorded on either a Bruker DPX 300 spectrometer at 75 MHz or a Bruker DPX 400 spectrometer at 100 MHz. <sup>11</sup>B NMR spectra were recorded on either a Bruker DPX 300 spectrometer at 96 MHz or a Bruker DPX 400 spectrometer at 128 MHz. All chemical shifts were reported in  $\delta$  units with references to the residual solvent resonances of the deuterated solvents for proton and carbon chemical shifts, to external BF<sub>3</sub>·OEt<sub>2</sub> (0.00 ppm) for boron chemical shifts. Elemental analyses were performed by the Shanghai Institute of Organic Chemistry, CAS, China.

**Preparation of 2,8-(CH<sub>2</sub>)<sub>3</sub>-9-(2'-{1',3'-[2'',6''-<sup>i</sup>Pr<sub>2</sub>(C<sub>6</sub>H<sub>3</sub>)]<sub>2</sub>-1',3'-N<sub>2</sub>C<sub>3</sub>H<sub>2</sub>})-2,8-C<sub>2</sub>B<sub>11</sub>H<sub>11</sub> (**1**).**

A THF solution (5 mL) of 1,3-bis(2,6-diisopropylphenyl)imidazol-2-ylidene (78 mg, 0.2 mmol) was slowly added to a stirring solution of 1,2-(CH<sub>2</sub>)<sub>3</sub>-1,2-C<sub>2</sub>B<sub>11</sub>H<sub>11</sub> (39 mg, 0.2 mmol) in THF (5 mL) at room temperature, and the mixture was stirred for 1 d. After removal of the solvent, the residue was subject to chromatographic separation (SiO<sub>2</sub>, 300-400 mesh, *n*-hexane/CH<sub>2</sub>Cl<sub>2</sub> 3:1), giving **1** as a white solid (96 mg, 82%). X-ray-quality crystals were obtained by recrystallization

from acetone.  $^1\text{H}$  NMR (acetone- $d_6$ ):  $\delta$  8.02 (s, 2H, imidazolium NCH), 7.56 (t,  $J$  = 7.8 Hz, 2H,  $\text{C}_6\text{H}_3$ ), 7.44 (d,  $J$  = 7.6 Hz, 2H,  $\text{C}_6\text{H}_3$ ), 7.37 (d,  $J$  = 7.6 Hz, 2H,  $\text{C}_6\text{H}_3$ ), 2.72 (m, 2H,  $\text{CH}(\text{CH}_3)_2$ ), 2.58 (m, 2H,  $\text{CH}(\text{CH}_3)_2$ ), 2.52 (m, 1H,  $\text{CH}_2$ ), 2.14 (m, 1H,  $\text{CH}_2$ ), 1.61 (m, 1H,  $\text{CH}_2$ ), 1.46 (d,  $J$  = 6.8 Hz, 6H,  $\text{CH}(\text{CH}_3)_2$ ), 1.40 (m, 3H,  $\text{CH}_2$ ), 1.34 (d,  $J$  = 6.8 Hz, 6H,  $\text{CH}(\text{CH}_3)_2$ ), 1.20 (d,  $J$  = 6.8 Hz, 6H,  $\text{CH}(\text{CH}_3)_2$ ), 1.15 (d,  $J$  = 6.8 Hz, 6H,  $\text{CH}(\text{CH}_3)_2$ ).  $^{13}\text{C}\{^1\text{H}\}$  NMR (acetone- $d_6$ ):  $\delta$  146.7, 146.3, 134.4, 132.0, 127.1, 125.1, 124.9 ( $\text{C}_6\text{H}_3$  & imidazolium NCH), 76.0 ( $\nu_{1/2}$  = 40 Hz), 48.5 ( $\nu_{1/2}$  = 36 Hz) (cage C), 44.3, 35.6, 21.3 ( $\text{CH}_2$ ), 30.0, 29.9 ( $\text{CH}(\text{CH}_3)_2$ ), 26.3, 26.2, 22.4, 22.2 ( $\text{CH}(\text{CH}_3)_2$ ), the imidazolium NCN carbon was not observed.  $^{11}\text{B}$  NMR (acetone- $d_6$ ):  $\delta$  7.5 (d,  $J$  = 142 Hz, 1B), -1.9 (d,  $J$  = 64 Hz, 1B), -3.5 (d,  $J$  = 151 Hz, 2B), -9.0 (d,  $J$  = 131 Hz, 1B), -16.7 (d,  $J$  = 148 Hz, 2B), -18.4 (d,  $J$  = 211 Hz, 2B), -23.5 (d,  $J$  = 132 Hz, 1B), -35.2 (d,  $J$  = 132 Hz, 1B). IR (KBr,  $\text{cm}^{-1}$ ):  $\nu_{\text{BH}}$  2545 (vs). HRMS:  $m/z$  calcd for  $\text{C}_{32}\text{H}_{53}\text{B}_{11}\text{N}_2$   $[\text{M} - 2\text{H}]^+$ : 582.5160. Found: 582.5183. Anal. Calcd for  $\text{C}_{32}\text{H}_{53}\text{B}_{11}\text{N}_2$ : C, 65.73; H, 9.14; N, 4.79. Found: C, 65.77; H, 9.13; N, 4.78.

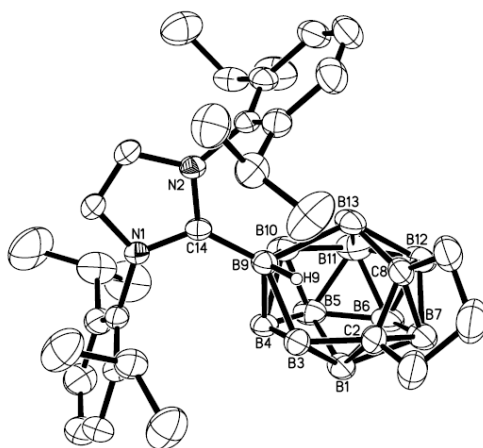

**Figure S1.** Molecular structure of 2,8-( $\text{CH}_2$ )<sub>3</sub>-9-(2'-{1',3'-[2'',6''- $i$ Pr<sub>2</sub>( $\text{C}_6\text{H}_3$ )]<sub>2</sub>-1',3'- $\text{N}_2\text{C}_3\text{H}_2$ })-2,8- $\text{C}_2\text{B}_{11}\text{H}_{11}$  (**1**).

**Preparation of 2,8-( $\text{CH}_2$ )<sub>3</sub>-9-(2'-{1',3'-[2'',4'',6''-Me<sub>3</sub>( $\text{C}_6\text{H}_2$ )]<sub>2</sub>-1',3'- $\text{N}_2\text{C}_3\text{H}_2$ })-2,8-  $\text{C}_2\text{B}_{11}\text{H}_{11}$  (**2**).** This complex was prepared as a white solid from 1,2-( $\text{CH}_2$ )<sub>3</sub>-1,2- $\text{C}_2\text{B}_{11}\text{H}_{11}$  (39 mg, 0.2 mmol)

and 1,3-bis(2,4,6-trimethylphenyl)imidazol-2-ylidene (61 mg, 0.2 mmol) in THF using the same procedure reported for **1**: yield 80 mg (80%).  $^1\text{H}$  NMR (acetone- $d_6$ ):  $\delta$  7.82 (s, 2H, imidazolium NCH), 7.16 (s, 2H,  $\text{C}_6\text{H}_2$ ), 7.08 (s, 2H,  $\text{C}_6\text{H}_2$ ), 2.37 (s, 6H,  $\text{CH}_3$ ), 2.32 (m, 1H,  $\text{CH}_2$ ), 2.21 (s, 6H,  $\text{CH}_3$ ), 2.12 (m, 1H,  $\text{CH}_2$ ), 2.08 (s, 6H,  $\text{CH}_3$ ), 1.59 (m, 1H,  $\text{CH}_2$ ), 1.34 (m, 2H,  $\text{CH}_2$ ), 0.76 (m, 1H,  $\text{CH}_2$ ).  $^{13}\text{C}\{^1\text{H}\}$  NMR (acetone- $d_6$ ):  $\delta$  141.3, 136.8, 136.1, 134.3, 130.2, 130.0, 125.7 ( $\text{C}_6\text{H}_2$  & imidazolium NCH), 77.0 ( $\nu_{1/2}$  = 38 Hz), 48.5 ( $\nu_{1/2}$  = 36 Hz) (cage C), 44.1, 35.0, 21.4 ( $\text{CH}_2$ ), 21.1, 18.2, 18.1 ( $\text{CH}_3$ ), the imidazolium NCN carbon was not observed.  $^{11}\text{B}$  NMR (acetone- $d_6$ ):  $\delta$  6.8 (d,  $J$  = 163 Hz, 1B), -2.8 (d,  $J$  = 74 Hz, 1B), -4.9 (d,  $J$  = 144 Hz, 1B), -9.5 (d,  $J$  = 124 Hz, 2B), -16.3 (d,  $J$  = 131 Hz, 2B), -18.8 (d,  $J$  = 128 Hz, 2B), -23.8 (d,  $J$  = 133 Hz, 1B), -35.4 (d,  $J$  = 138 Hz, 1B). IR (KBr,  $\text{cm}^{-1}$ ):  $\nu_{\text{BH}}$  2529 (vs). HRMS:  $m/z$  calcd for  $\text{C}_{26}\text{H}_{41}\text{B}_{11}\text{N}_2$   $[\text{M}]^+$ : 500.4374. Found: 500.4368. Anal. Calcd for  $\text{C}_{26}\text{H}_{41}\text{B}_{11}\text{N}_2$ : C, 62.39; H, 8.26; N, 5.60. Found: C, 62.39; H, 8.28; N, 5.31.

**Preparation of 2,8-( $\text{CH}_2$ )<sub>3</sub>-9-(2'-{1',3'-[2'',6''- $i$ -Pr<sub>2</sub>( $\text{C}_6\text{H}_3$ )]<sub>2</sub>-1',3'-N<sub>2</sub>C<sub>3</sub>H<sub>4</sub>)}-2,8-C<sub>2</sub>B<sub>11</sub>H<sub>11</sub> (**3**).**

A THF solution (5 mL) of 1,3-bis(2,6-di- $i$ -propylphenyl)imidazolidin-2-ylidene (78 mg, 0.2 mmol) was slowly added to a stirring solution of 1,2-( $\text{CH}_2$ )<sub>3</sub>-1,2-C<sub>2</sub>B<sub>11</sub>H<sub>11</sub> (39 mg, 0.2 mmol) in THF (5 mL) at room temperature, and the mixture was heated at 50 °C for 36 h in a sealed tube to give a brown solution. After removal of the solvent, the residue was subject to chromatographic separation ( $\text{SiO}_2$ , 300-400 mesh,  $n$ -hexane/ $\text{CH}_2\text{Cl}_2$  3:1), giving **3** as a white solid (92 mg, 78%). X-ray-quality crystals were obtained by recrystallization from acetone.  $^1\text{H}$  NMR (acetone- $d_6$ ):  $\delta$  7.42 (t,  $J$  = 7.7 Hz, 2H,  $\text{C}_6\text{H}_3$ ), 7.34 (d,  $J$  = 7.2 Hz, 2H,  $\text{C}_6\text{H}_3$ ), 7.29 (d,  $J$  = 7.2 Hz, 2H,  $\text{C}_6\text{H}_3$ ), 4.44 (brs, 4H, imidazolium NCH<sub>2</sub>), 3.30 (m, 2H,  $\text{CH}(\text{CH}_3)_2$ ), 3.24 (m, 2H,  $\text{CH}(\text{CH}_3)_2$ ), 2.62 (m, 1H,  $\text{CH}_2$ ), 2.15 (m, 1H,  $\text{CH}_2$ ), 1.63 (m, 1H,  $\text{CH}_2$ ), 1.52 (d,  $J$  = 6.2 Hz, 6H,  $\text{CH}(\text{CH}_3)_2$ ), 1.47 (m, 2H,  $\text{CH}_2$ ), 1.42 (d,  $J$  = 6.2 Hz, 6H,  $\text{CH}(\text{CH}_3)_2$ ), 1.31 (d,  $J$  = 6.2 Hz, 6H,  $\text{CH}(\text{CH}_3)_2$ ), 1.30 (m, 1H,  $\text{CH}_2$ ), 1.29 (d,  $J$  = 6.2

Hz, 6H, CH(CH<sub>3</sub>)<sub>2</sub>). <sup>13</sup>C{<sup>1</sup>H} NMR (acetone-*d*<sub>6</sub>): δ 147.5, 147.2, 134.9, 131.1, 125.5 (C<sub>6</sub>H<sub>3</sub>), 76.3 (ν<sub>1/2</sub> = 36 Hz), 51.0 (ν<sub>1/2</sub> = 36 Hz) (cage C), 55.0 (imidazolium NCH<sub>2</sub>), 44.4, 36.2, 21.4 (CH<sub>2</sub>), 26.9, 26.8, 23.3, 23.1 (CH(CH<sub>3</sub>)<sub>2</sub>), the imidazolium NCN carbon was not observed. <sup>11</sup>B NMR (acetone-*d*<sub>6</sub>): δ 8.0 (d, *J* = 137 Hz, 1B), -1.9 (d, *J* = 52 Hz, 1B), -2.5 (d, *J* = 104 Hz, 2B), -9.1 (d, *J* = 131 Hz, 1B), -16.3 (d, *J* = 113 Hz, 1B), -17.1 (d, *J* = 125 Hz, 2B), -17.9 (d, *J* = 115 Hz, 1B), -23.2 (d, *J* = 130 Hz, 1B), -34.0 (d, *J* = 134 Hz, 1B). IR (KBr, cm<sup>-1</sup>): ν<sub>BH</sub> 2534 (vs). HRMS: *m/z* calcd for C<sub>32</sub>H<sub>55</sub>B<sub>11</sub>N<sub>2</sub> [M]<sup>+</sup>: 586.5456. Found: 586.5450. Anal. Calcd for C<sub>32</sub>H<sub>55</sub>B<sub>11</sub>N<sub>2</sub>: C, 65.51; H, 9.45; N, 4.77. Found: C, 65.51; H, 9.07; N, 4.58.

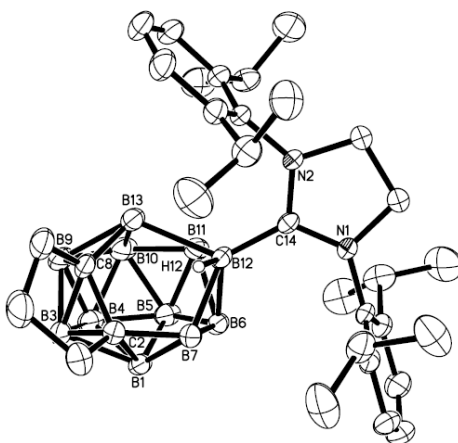

**Figure S2.** Molecular structure of 2,8-(CH<sub>2</sub>)<sub>3</sub>-12-(2'-{1',3'-[2'',6''-*i*-Pr<sub>2</sub>(C<sub>6</sub>H<sub>3</sub>)]<sub>2</sub>-1',3'-N<sub>2</sub>C<sub>3</sub>H<sub>4</sub>))-2,8-C<sub>2</sub>B<sub>11</sub>H<sub>11</sub> (**3**).

**Preparation of 2,8-(CH<sub>2</sub>)<sub>3</sub>-9-(2'-{1',3'-[2'',4'',6''-Me<sub>3</sub>(C<sub>6</sub>H<sub>2</sub>)]<sub>2</sub>-1',3'-N<sub>2</sub>C<sub>3</sub>H<sub>4</sub>))-2,8-C<sub>2</sub>B<sub>11</sub>H<sub>11</sub> (**4**).** A THF solution (5 mL) of 1,3-bis(2,4,6-trimethylphenyl)-4,5-dihydroimidazol-2-ylidene (61 mg, 0.2 mmol) was slowly added to a stirring solution of 1,2-(CH<sub>2</sub>)<sub>3</sub>-1,2-C<sub>2</sub>B<sub>11</sub>H<sub>11</sub> (39 mg, 0.2 mmol) in THF (5 mL) at room temperature, and the mixture was stirred for 3 d. After removal of the solvent, the residue was subject to chromatographic separation (SiO<sub>2</sub>, 300-400 mesh, *n*-hexane/CH<sub>2</sub>Cl<sub>2</sub> 3:1), giving **4** as a white solid (81 mg, 81%). X-ray-quality crystals were obtained

by recrystallization from acetone.  $^1\text{H}$  NMR (acetone- $d_6$ ):  $\delta$  7.05 (s, 2H,  $\text{C}_6\text{H}_2$ ), 6.99 (s, 2H,  $\text{C}_6\text{H}_2$ ), 4.35 (m, 4H, imidazolium  $\text{NCH}_2$ ), 2.46 (s, 6H,  $\text{CH}_3$ ), 2.42 (m, 1H,  $\text{CH}_2$ ), 2.35 (s, 6H,  $\text{CH}_3$ ), 2.30 (s, 6H,  $\text{CH}_3$ ), 2.14 (m, 1H,  $\text{CH}_2$ ), 1.58 (m, 1H,  $\text{CH}_2$ ), 1.34 (m, 2H,  $\text{CH}_2$ ), 0.79 (m, 1H,  $\text{CH}_2$ ).  $^{13}\text{C}\{^1\text{H}\}$  NMR (acetone- $d_6$ ):  $\delta$  140.3, 137.5, 136.8, 134.6, 130.6, 130.3 ( $\text{C}_6\text{H}_2$ ), 52.0 (imidazolium  $\text{NCH}_2$ ), 44.2, 35.3, 21.5 ( $\text{CH}_2$ ), 21.1, 18.6, 18.5 ( $\text{CH}_3$ ), the imidazolium  $\text{NCN}$  and cage  $\text{C}$  atoms were not observed.  $^{11}\text{B}$  NMR (acetone- $d_6$ ):  $\delta$  7.7 (d,  $J = 142$  Hz, 1B), -2.1 (d,  $J = 84$  Hz, 1B), -3.2 (d,  $J = 165$  Hz, 1B), -6.6 (d,  $J = 115$  Hz, 1B), -9.5 (d,  $J = 131$  Hz, 1B), -16.1 (d,  $J = 147$  Hz, 2B), -17.4 (d,  $J = 114$  Hz, 1B), -18.1 (d,  $J = 143$  Hz, 1B), -22.5 (d,  $J = 143$  Hz, 1B), -34.3 (d,  $J = 143$  Hz, 1B). IR (KBr,  $\text{cm}^{-1}$ ):  $\nu_{\text{BH}}$  2530 (vs). HRMS:  $m/z$  calcd for  $\text{C}_{26}\text{H}_{43}\text{B}_{11}\text{N}_2$   $[\text{M}]^+$ : 502.4531. Found: 500.4522. Anal. Calcd for  $\text{C}_{26}\text{H}_{43}\text{B}_{11}\text{N}_2$ : C, 62.14; H, 8.62; N, 5.57. Found: C, 61.93; H, 8.64; N, 5.28.

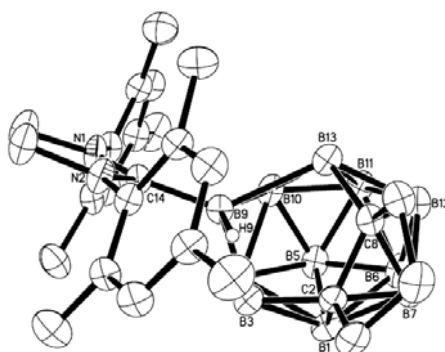

**Figure S3.** Molecular structure of 2,8-( $\text{CH}_2$ )<sub>3</sub>-9-(2'-{1',3'-[2'',4'',6''-Me<sub>3</sub>( $\text{C}_6\text{H}_2$ )]<sub>2</sub>-1',3'-N<sub>2</sub>C<sub>3</sub>H<sub>4</sub>))-2,8-C<sub>2</sub>B<sub>11</sub>H<sub>11</sub> (**4**).

**Preparation of 2,8-(CH<sub>2</sub>)<sub>3</sub>-9-(2'-{1',3'-[2'',6''-*i*-Pr<sub>2</sub>(C<sub>6</sub>H<sub>3</sub>)]<sub>2</sub>-1',3'-N<sub>2</sub>C<sub>3</sub>H<sub>2</sub>)-12-Ph-2,8-C<sub>2</sub>B<sub>11</sub>H<sub>10</sub> (**5**).** A THF solution (5 mL) of 1,3-bis(2,6-diisopropylphenyl)imidazol-2-ylidene (78 mg, 0.2 mmol) was slowly added to a stirring solution of 1,2-(CH<sub>2</sub>)<sub>3</sub>-3-Ph-1,2-C<sub>2</sub>B<sub>11</sub>H<sub>10</sub> (55 mg, 0.2 mmol) in THF (5 mL) at room temperature, and the mixture was heated at 50 °C for 1 d in a sealed tube to give a brown solution. After removal of the solvent, the residue was subject to

chromatographic separation (SiO<sub>2</sub>, 300-400 mesh, *n*-hexane/CH<sub>2</sub>Cl<sub>2</sub> 5:2), giving **5** as a white solid (91 mg, 69%). X-ray-quality crystals were obtained by recrystallization from acetone. <sup>1</sup>H NMR (acetone-*d*<sub>6</sub>): δ 8.06 (s, 2H, imidazolium NCH), 7.54 (t, *J* = 8.0 Hz, 2H, C<sub>6</sub>H<sub>3</sub>), 7.45 (d, *J* = 7.6 Hz, 2H, C<sub>6</sub>H<sub>3</sub>), 7.37 (d, *J* = 7.6 Hz, 2H, C<sub>6</sub>H<sub>3</sub>), 7.32 (m, 2H, C<sub>6</sub>H<sub>5</sub>), 7.12 (m, 3H, C<sub>6</sub>H<sub>5</sub>), 2.75 (m, 2H, CH(CH<sub>3</sub>)<sub>2</sub>), 2.61 (m, 2H, CH(CH<sub>3</sub>)<sub>2</sub>), 2.51 (m, 1H, CH<sub>2</sub>), 2.14 (m, 1H, CH<sub>2</sub>), 1.49 (d, *J* = 6.8 Hz, 6H, CH(CH<sub>3</sub>)<sub>2</sub>), 1.38 (d, *J* = 6.8 Hz, 6H, CH(CH<sub>3</sub>)<sub>2</sub>), 1.30 (m, 3H, CH<sub>2</sub>), 1.22 (d, *J* = 6.8 Hz, 6H, CH(CH<sub>3</sub>)<sub>2</sub>), 1.17 (d, *J* = 6.8 Hz, 6H, CH(CH<sub>3</sub>)<sub>2</sub>), 0.75 (m, 1H, CH<sub>2</sub>). <sup>13</sup>C{<sup>1</sup>H} NMR (acetone-*d*<sub>6</sub>): δ 146.8, 146.3, 134.5, 133.6, 132.0, 127.6, 127.3, 127.1, 125.0, 124.9 (C<sub>6</sub>H<sub>5</sub> & C<sub>6</sub>H<sub>3</sub> & imidazolium NCH), 77.5 (*v*<sub>1/2</sub> = 36 Hz), 46.0 (*v*<sub>1/2</sub> = 36 Hz) (cage C), 44.2, 32.2, 21.3 (CH<sub>2</sub>), 30.0, 26.3, 26.2, 22.5, 22.2 (CH(CH<sub>3</sub>)<sub>2</sub>), the imidazolium NCN carbon was not observed. <sup>11</sup>B NMR (acetone-*d*<sub>6</sub>): δ 13.9 (s, 1B, *B*Ph), -1.4 (d, *J* = 55 Hz, 1B), -2.1 (d, *J* = 141 Hz, 1B), -8.5 (d, *J* = 124 Hz, 2B), -15.9 (d, *J* = 143 Hz, 2B), -16.8 (d, *J* = 151 Hz, 2B), -21.4 (d, *J* = 138 Hz, 1B), -35.4 (d, *J* = 138 Hz, 1B). IR (KBr, cm<sup>-1</sup>): *v*<sub>BH</sub> 2533 (vs). HRMS: *m/z* calcd for C<sub>38</sub>H<sub>57</sub>B<sub>11</sub>N<sub>2</sub> [M]<sup>+</sup>: 660.5617. Found: 660.5614. Anal. Calcd for C<sub>38</sub>H<sub>57</sub>B<sub>11</sub>N<sub>2</sub>: C, 69.07; H, 8.69; N, 4.24. Found: C, 69.00; H, 8.76; N, 4.25.

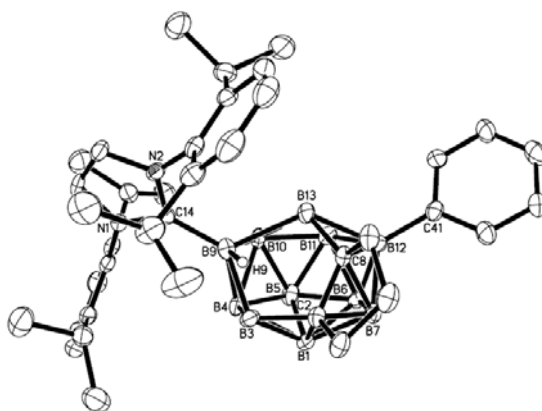

**Figure S4.** Molecular structure of 2,8-(CH<sub>2</sub>)<sub>3</sub>-9-(2'-{1',3'-[2'',6''-*i*Pr<sub>2</sub>(C<sub>6</sub>H<sub>3</sub>)]<sub>2</sub>-1',3'-N<sub>2</sub>C<sub>3</sub>H<sub>2</sub>)-12-Ph-2,8-C<sub>2</sub>B<sub>11</sub>H<sub>11</sub> (**5**).

**Preparation of 2,8-(CH<sub>2</sub>)<sub>3</sub>-9-(2'-{1',3'-[2'',4'',6''-Me<sub>3</sub>(C<sub>6</sub>H<sub>2</sub>)]<sub>2</sub>-1',3'-N<sub>2</sub>C<sub>3</sub>H<sub>2</sub>})-12-Ph-2,8-C<sub>2</sub>B<sub>11</sub>H<sub>10</sub> (6).** A THF solution (5 mL) of 1,3-bis(2,4,6-trimethylphenyl)imidazol-2-ylidene (61 mg, 0.2 mmol) was slowly added to a stirring solution of 1,2-(CH<sub>2</sub>)<sub>3</sub>-3-Ph-1,2-C<sub>2</sub>B<sub>11</sub>H<sub>10</sub> (55 mg, 0.2 mmol) in THF (5 mL) at room temperature, and the mixture was stirred for 3 d. After removal of the solvent, the residue was subject to chromatographic separation (SiO<sub>2</sub>, 300-400 mesh, *n*-hexane/CH<sub>2</sub>Cl<sub>2</sub> 2:5), giving **6** as a white solid (77 mg, 80%). <sup>1</sup>H NMR (acetone-*d*<sub>6</sub>): δ 7.84 (s, 2H, imidazolium NCH), 7.38 (m, 2H, aromatic CH), 7.14 (m, 5H, aromatic CH), 7.07 (s, 2H, aromatic CH), 2.36 (s, 6H, CH<sub>3</sub>), 2.31 (m, 1H, CH<sub>2</sub>), 2.24 (s, 6H, CH<sub>3</sub>), 2.14 (m, 1H, CH<sub>2</sub>), 2.09 (s, 6H, CH<sub>3</sub>), 1.23 (m, 3H, CH<sub>2</sub>), 0.45 (m, 1H, CH<sub>2</sub>). <sup>13</sup>C{<sup>1</sup>H} NMR (acetone-*d*<sub>6</sub>): δ 141.3, 136.8, 136.1, 134.4, 133.8, 130.5, 130.2, 130.0, 127.6, 127.3, 125.8 (C<sub>6</sub>H<sub>5</sub> & C<sub>6</sub>H<sub>2</sub> & imidazolium NCH), 77.0 (ν<sub>1/2</sub> = 36 Hz), 48.0 (ν<sub>1/2</sub> = 36 Hz) (cage C), 44.1, 31.6, 21.4 (CH<sub>2</sub>), 21.1, 18.3, 18.1 (CH<sub>3</sub>), the imidazolium NCN carbon was not observed. <sup>11</sup>B NMR (acetone-*d*<sub>6</sub>): δ 13.5 (s, 1B, BPh), -2.3 (d, *J* = 49 Hz, 1B), -3.5 (d, *J* = 127 Hz, 1B), -9.2 (d, *J* = 133 Hz, 2B), -15.4 (d, *J* = 132 Hz, 3B), -18.1 (d, *J* = 176 Hz, 1B), -21.4 (d, *J* = 125 Hz, 1B), -35.4 (d, *J* = 139 Hz, 1B). IR (KBr, cm<sup>-1</sup>): ν<sub>BH</sub> 2531 (vs). HRMS: *m/z* calcd for C<sub>32</sub>H<sub>45</sub>B<sub>11</sub>N<sub>2</sub> [M]<sup>+</sup>: 576.4690. Found: 576.4703. Anal. Calcd for C<sub>32</sub>H<sub>45</sub>B<sub>11</sub>N<sub>2</sub>: C, 66.65; H, 7.87; N, 4.86. Found: C, 66.82; H, 8.00; N, 4.41.

**Preparation of 2,8-(CH<sub>2</sub>)<sub>3</sub>-9-(2'-{1',3'-[2'',6''-<sup>*i*</sup>Pr<sub>2</sub>(C<sub>6</sub>H<sub>3</sub>)]<sub>2</sub>-1',3'-N<sub>2</sub>C<sub>3</sub>H<sub>4</sub>)-12-Ph-2,8-C<sub>2</sub>B<sub>11</sub>H<sub>10</sub> (7).** A THF solution (5 mL) of 1,3-bis(2,6-di-*i*-propylphenyl)imidazolidin-2-ylidene (78 mg, 0.2 mmol) was slowly added to a stirring solution of 1,2-(CH<sub>2</sub>)<sub>3</sub>-3-Ph-1,2-C<sub>2</sub>B<sub>11</sub>H<sub>10</sub> (55 mg, 0.2 mmol) in THF (5 mL) at room temperature, and the mixture was heated at 60 °C for 12 h in a sealed tube to give a brown solution. After removal of the solvent, the residue was subject to chromatographic separation (SiO<sub>2</sub>, 300-400 mesh, *n*-hexane/CH<sub>2</sub>Cl<sub>2</sub> 5:2), giving **7** as a white solid



(86 mg, 65%).  $^1\text{H}$  NMR (acetone- $d_6$ ):  $\delta$  7.40 (t,  $J$  = 7.6 Hz 2H, aromatic CH), 7.30 (m, 6H, aromatic CH), 7.11 (m, 3H, aromatic CH), 4.47 (s, 4H, imidazolium  $\text{NCH}_2$ ), 3.35 (m, 2H,  $\text{CH}(\text{CH}_3)_2$ ), 3.27 (m, 2H,  $\text{CH}(\text{CH}_3)_2$ ), 2.60 (m, 1H,  $\text{CH}_2$ ), 2.15 (m, 1H,  $\text{CH}_2$ ), 1.54 (d,  $J$  = 6.7 Hz, 6H,  $\text{CH}(\text{CH}_3)_2$ ), 1.47 (d,  $J$  = 6.7 Hz, 6H,  $\text{CH}(\text{CH}_3)_2$ ), 1.39 (m, 1H,  $\text{CH}_2$ ), 1.33 (d,  $J$  = 6.7 Hz, 6H,  $\text{CH}(\text{CH}_3)_2$ ), 1.31 (d,  $J$  = 6.7 Hz, 6H,  $\text{CH}(\text{CH}_3)_2$ ), 1.26 (m, 2H,  $\text{CH}_2$ ), 1.05 (m, 1H,  $\text{CH}_2$ ).  $^{13}\text{C}\{^1\text{H}\}$  NMR (acetone- $d_6$ ):  $\delta$  147.6, 147.2, 135.0, 133.5, 131.1, 127.6, 127.2, 125.4 ( $\text{C}_6\text{H}_5$  &  $\text{C}_6\text{H}_3$ ), 55.0 (imidazolium  $\text{NCH}_2$ ), 44.3, 32.7, 21.3 ( $\text{CH}_2$ ), 26.9, 26.8, 23.4, 23.1 ( $\text{CH}(\text{CH}_3)_2$ ), the imidazolium NCN and cage C atoms were not observed.  $^{11}\text{B}$  NMR (acetone- $d_6$ ):  $\delta$  13.2 (s, 1B, BPh), -2.0 (d,  $J$  = 108 Hz, 2B), -2.6 (d,  $J$  = 65 Hz, 1B), -10.0 (d,  $J$  = 122 Hz, 2B), -17.0 (d,  $J$  = 131 Hz, 3B), -21.9 (d,  $J$  = 145 Hz, 1B), -35.2 (d,  $J$  = 139 Hz, 1B). IR (KBr,  $\text{cm}^{-1}$ ):  $\nu_{\text{BH}}$  2533 (vs). HRMS:  $m/z$  calcd for  $\text{C}_{38}\text{H}_{59}\text{B}_{11}\text{N}_2 [\text{M}]^+$ : 662.5774. Found: 662.5769. Anal. Calcd for  $\text{C}_{38}\text{H}_{59}\text{B}_{11}\text{N}_2$ : C, 68.86; H, 8.97; N, 4.23. Found: C, 68.95; H, 9.22; N, 3.81.

**Preparation of 2,8-(CH<sub>2</sub>)<sub>3</sub>-9-(2'-{1',3'-[2'',4'',6''-Me<sub>3</sub>(C<sub>6</sub>H<sub>2</sub>)<sub>2</sub>-1',3'-N<sub>2</sub>C<sub>3</sub>H<sub>4</sub>})-12-Ph-2,8-C<sub>2</sub>B<sub>11</sub>H<sub>10</sub> (8).** A THF solution (5 mL) of 1,3-bis(2,4,6-trimethylphenyl)-4,5-dihydroimidazol-2-ylidene (61 mg, 0.2 mmol) was slowly added to a stirring solution of 1,2-(CH<sub>2</sub>)<sub>3</sub>-3-Ph-1,2-C<sub>2</sub>B<sub>11</sub>H<sub>10</sub> (55 mg, 0.2 mmol) in THF (5 mL) at room temperature, and the mixture was stirred for 7 d. After removal of the solvent, the residue was subject to chromatographic separation (SiO<sub>2</sub>, 300-400 mesh, *n*-hexane/CH<sub>2</sub>Cl<sub>2</sub> 5:2), giving **8** as a white solid (70 mg, 60%).  $^1\text{H}$  NMR (acetone- $d_6$ ):  $\delta$  7.34 (m, 2H,  $\text{C}_6\text{H}_5$ ), 7.13 (m, 3H,  $\text{C}_6\text{H}_5$ ), 7.05 (s, 2H,  $\text{C}_6\text{H}_2$ ), 6.98 (s, 2H,  $\text{C}_6\text{H}_2$ ), 4.35 (m, 4H, imidazolium  $\text{NCH}_2$ ), 2.48 (s, 6H,  $\text{CH}_3$ ), 2.37 (s, 6H,  $\text{CH}_3$ ), 2.34 (m, 1H,  $\text{CH}_2$ ), 2.28 (s, 6H,  $\text{CH}_3$ ), 2.11 (m, 1H,  $\text{CH}_2$ ), 1.23 (m, 3H,  $\text{CH}_2$ ), 0.44 (m, 1H,  $\text{CH}_2$ ).  $^{13}\text{C}\{^1\text{H}\}$  NMR (acetone- $d_6$ ):  $\delta$  140.3, 137.6, 136.9, 134.6, 133.7, 130.6, 130.3, 127.6, 127.3 ( $\text{C}_6\text{H}_5$  &  $\text{C}_6\text{H}_2$ ),

51.9 (imidazolium NCH<sub>2</sub>), 44.2, 31.6, 21.4 (CH<sub>2</sub>), 21.0, 18.6, 18.5 (CH<sub>3</sub>), the imidazolium NCN and cage C atoms were not observed. <sup>11</sup>B NMR (acetone-*d*<sub>6</sub>): δ 13.6 (s, 1B, *BPh*), -2.5 (d, *J* = 49 Hz, 1B), -2.9 (d, *J* = 102 Hz, 1B), -6.8 (d, *J* = 125 Hz, 1B), -9.9 (d, *J* = 129 Hz, 1B), -16.0 (d, *J* = 138 Hz, 3B), -18.2 (d, *J* = 157 Hz, 1B), -21.2 (d, *J* = 143 Hz, 1B), -35.6 (d, *J* = 152 Hz, 1B). IR (KBr, cm<sup>-1</sup>): ν<sub>BH</sub> 2520 (vs). HRMS: *m/z* calcd for C<sub>32</sub>H<sub>47</sub>B<sub>11</sub>N<sub>2</sub> [M]<sup>+</sup>: 578.4847. Found: 578.4849. Anal. Calcd for C<sub>32</sub>H<sub>47</sub>B<sub>11</sub>N<sub>2</sub>: C, 66.42; H, 8.19; N, 4.84. Found: C, 66.81; H, 8.50; N, 4.38.

**Preparation of 2,8-(CH<sub>2</sub>)<sub>4</sub>-9-(2'-{1',3'-[2'',6'']-<sup>i</sup>Pr<sub>2</sub>(C<sub>6</sub>H<sub>3</sub>)<sub>2</sub>-1',3'-N<sub>2</sub>C<sub>3</sub>H<sub>2</sub>))-7,8-C<sub>2</sub>B<sub>11</sub>H<sub>11</sub> (9).**

A THF solution (5 mL) of 1,3-bis(2,6-diisopropylphenyl)imidazol-2-ylidene (78 mg, 0.2 mmol) was slowly added to a stirring solution of 1,2-(CH<sub>2</sub>)<sub>4</sub>-1,2-C<sub>2</sub>B<sub>11</sub>H<sub>11</sub> (42 mg, 0.2 mmol) in THF (5 mL) at room temperature, and the mixture was heated at 80 °C for 2 d in a sealed tube to give a brown solution. After removal of the solvent, the residue was subject to chromatographic separation (SiO<sub>2</sub>, 300-400 mesh, *n*-hexane/CH<sub>2</sub>Cl<sub>2</sub> 3:1), giving **9** as a white solid (77 mg, 64%). X-ray-quality crystals were obtained by recrystallization from acetone. <sup>1</sup>H NMR (acetone-*d*<sub>6</sub>): δ 8.04 (s, 2H, imidazolium NCH), 7.58 (t, *J* = 8.0 Hz, 2H, C<sub>6</sub>H<sub>3</sub>), 7.48 (d, *J* = 7.6 Hz, 2H, C<sub>6</sub>H<sub>3</sub>), 7.39 (d, *J* = 7.6 Hz, 2H, C<sub>6</sub>H<sub>3</sub>), 2.72 (m, 2H, CH(CH<sub>3</sub>)<sub>2</sub>), 2.63 (m, 2H, CH(CH<sub>3</sub>)<sub>2</sub>), 2.44 (m, 1H, CH<sub>2</sub>), 1.99 (m, 1H, CH<sub>2</sub>), 1.57 (m, 1H, CH<sub>2</sub>), 1.51 (d, *J* = 6.8 Hz, 6H, CH(CH<sub>3</sub>)<sub>2</sub>), 1.46 (m, 1H, CH<sub>2</sub>), 1.36 (d, *J* = 6.8 Hz, 6H, CH(CH<sub>3</sub>)<sub>2</sub>), 1.23 (d, *J* = 6.8 Hz, 6H, CH(CH<sub>3</sub>)<sub>2</sub>), 1.18 (m, 3H, CH<sub>2</sub>), 1.15 (d, *J* = 6.8 Hz, 6H, CH(CH<sub>3</sub>)<sub>2</sub>), 0.97 (m, 1H, CH<sub>2</sub>). <sup>13</sup>C{<sup>1</sup>H} NMR (acetone-*d*<sub>6</sub>): δ 146.8, 146.4, 134.5, 132.1, 127.2, 125.2, 125.1 (C<sub>6</sub>H<sub>3</sub> & imidazolium NCH), 42.2, 33.7, 23.0, 22.0 (CH<sub>2</sub>), 26.4, 26.3, 22.6, 22.2 (CH(CH<sub>3</sub>)<sub>2</sub>), the imidazolium NCN and cage C atoms were not observed. <sup>11</sup>B NMR (acetone-*d*<sub>6</sub>): δ 7.8 (d, *J* = 158 Hz, 1B), -2.4 (d, *J* = 48 Hz, 1B), -2.2 (d, *J* = 100 Hz, 1B), -6.9 (d, *J* = 126 Hz, 2B), -13.7 (d, *J* = 149 Hz, 1B), -16.0 (d, *J* = 140 Hz, 2B), -18.4 (d, *J* = 149 Hz, 1B), -23.3 (d, *J* = 136 Hz,

1B), -35.5 (d,  $J = 147$  Hz, 1B). IR (KBr,  $\text{cm}^{-1}$ ):  $\nu_{\text{BH}}$  2539 (vs). HRMS:  $m/z$  calcd for  $\text{C}_{33}\text{H}_{55}\text{B}_{11}\text{N}_2$   $[\text{M}]^+$ : 598.5473. Found: 598.5461. Anal. Calcd for  $\text{C}_{33}\text{H}_{55}\text{B}_{11}\text{N}_2$ : C, 66.20; H, 9.26; N, 4.68. Found: C, 66.47; H, 9.44; N, 4.24.

**Alternative Method for Preparation of 9.** To a stirring THF (15 mL) solution of 1,2-( $\text{CH}_2$ )<sub>4</sub>-1,2- $\text{C}_2\text{B}_{11}\text{H}_{11}$  (105 mg, 0.50 mmol) was added a THF solution (5 mL) of 1,3,4,5-tetramethylimidazol-2-ylidene (62 mg, 0.50 mmol) at room temperature, to which was added 1,3-bis(2,6-diisopropylphenyl)imidazolium chloride (213 mg, 0.50 mmol). The mixture was heated at 80 °C for 2 d in a sealed flask to give a brown solution. After removal of the solvent, the residue was subject to chromatographic separation ( $\text{SiO}_2$ , 300-400 mesh,  $n$ -hexane/ $\text{CH}_2\text{Cl}_2$  3:1), giving **9** as a white solid (195 mg, 65%).

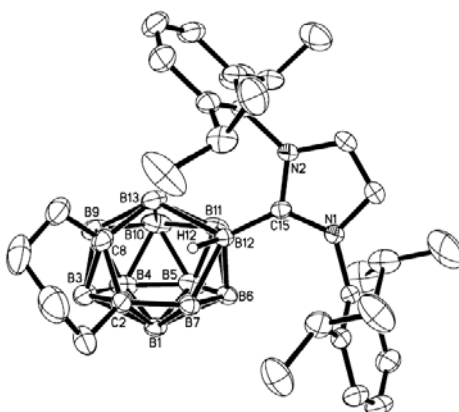

**Figure S5.** Molecular structure of 2,8-( $\text{CH}_2$ )<sub>4</sub>-12-(2'-{1',3'-[2'',6''- $i$ -Pr<sub>2</sub>(C<sub>6</sub>H<sub>3</sub>)]<sub>2</sub>-1',3'-N<sub>2</sub>C<sub>3</sub>H<sub>2</sub>})-7,8- $\text{C}_2\text{B}_{11}\text{H}_{11}$  (**9**).

**Preparation of 2,8-( $\text{CH}_2$ )<sub>4</sub>-9-(2'-{1',3'-[2'',4'',6''-Me<sub>3</sub>(C<sub>6</sub>H<sub>2</sub>)]<sub>2</sub>-1',3'-N<sub>2</sub>C<sub>3</sub>H<sub>2</sub>})-2,8- $\text{C}_2\text{B}_{11}\text{H}_{11}$  (**10**).** This complex was prepared as a white solid from 1,2-( $\text{CH}_2$ )<sub>4</sub>-1,2- $\text{C}_2\text{B}_{11}\text{H}_{11}$  (42 mg, 0.2 mmol) and 1,3-bis(2,4,6-trimethylphenyl)imidazol-2-ylidene (61 mg, 0.2 mmol) in THF using the same procedure reported for **9**: yield 70 mg (68%). X-ray-quality crystals were obtained by recrystallization from acetone. <sup>1</sup>H NMR (acetone- $d_6$ ):  $\delta$  7.81 (s, 2H, imidazolium NCH), 7.17 (s,

2H, C<sub>6</sub>H<sub>2</sub>), 7.07 (s, 2H, C<sub>6</sub>H<sub>2</sub>), 2.45 (m, 1H, CH<sub>2</sub>), 2.36 (s, 6H, CH<sub>3</sub>), 2.27 (s, 6H, CH<sub>3</sub>), 2.07 (s, 6H, CH<sub>3</sub>), 1.98 (m, 1H, CH<sub>2</sub>), 1.61 (m, 1H, CH<sub>2</sub>), 1.51 (m, 1H, CH<sub>2</sub>), 1.34 (m, 1H, CH<sub>2</sub>), 1.20 (m, 2H, CH<sub>2</sub>), 0.77 (m, 2H, CH<sub>2</sub>). <sup>13</sup>C{<sup>1</sup>H} NMR (acetone-*d*<sub>6</sub>): δ 141.2, 137.1, 135.7, 134.3, 130.3, 130.2, 125.8 (C<sub>6</sub>H<sub>2</sub> & imidazolium NCH), 42.8, 33.3, 22.8, 22.4 (CH<sub>2</sub>), 21.1, 18.3, 18.1 (CH<sub>3</sub>), the imidazolium NCN and cage C atoms were not observed. <sup>11</sup>B NMR (acetone-*d*<sub>6</sub>): δ 6.1 (d, *J* = 139 Hz, 1B), -3.8 (d, *J* = 40 Hz, 1B), -4.0 (d, *J* = 122 Hz, 1B), -8.6 (d, *J* = 121 Hz, 2B), -14.7 (d, *J* = 162 Hz, 1B), -16.7 (d, *J* = 135 Hz, 2B), -19.4 (d, *J* = 151 Hz, 1B), -24.2 (d, *J* = 144 Hz, 1B), -36.2 (d, *J* = 137 Hz, 1B). IR (KBr, cm<sup>-1</sup>): ν<sub>BH</sub> 2527 (vs). HRMS: *m/z* calcd for C<sub>27</sub>H<sub>43</sub>B<sub>11</sub>N<sub>2</sub> [M]<sup>+</sup>: 513.4453. Found: 513.4454. Anal. Calcd for C<sub>27</sub>H<sub>43</sub>B<sub>11</sub>N<sub>2</sub>: C, 63.02; H, 8.42; N, 5.44. Found: C, 63.26; H, 8.79; N, 4.99.

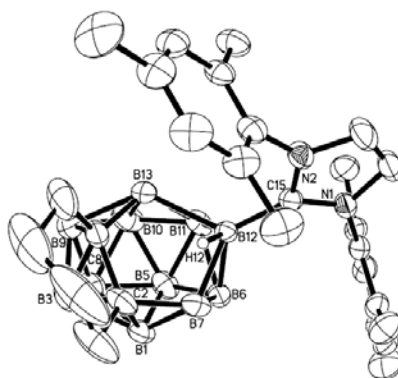

**Figure S6.** Molecular structure of 2,8-(CH<sub>2</sub>)<sub>4</sub>-12-(2'-{1',3'-[2'',4'',6''-Me<sub>3</sub>(C<sub>6</sub>H<sub>2</sub>)]<sub>2</sub>-1',3'-N<sub>2</sub>C<sub>3</sub>H<sub>2</sub>}-2,8-C<sub>2</sub>B<sub>11</sub>H<sub>11</sub> (**10**).

**Preparation of 2,8-(CH<sub>2</sub>)<sub>4</sub>-9-(2'-{1',3'-[2'',6''-*i*-Pr<sub>2</sub>(C<sub>6</sub>H<sub>3</sub>)]<sub>2</sub>-1',3'-N<sub>2</sub>C<sub>3</sub>H<sub>2</sub>)-12-Ph-2,8-C<sub>2</sub>B<sub>11</sub>H<sub>10</sub> (**11**).** A THF solution (5 mL) of 1,3-bis(2,6-diisopropylphenyl)imidazol-2-ylidene (78 mg, 0.2 mmol) was slowly added to a stirring solution of 1,2-(CH<sub>2</sub>)<sub>4</sub>-3-Ph-1,2-C<sub>2</sub>B<sub>11</sub>H<sub>10</sub> (57 mg, 0.2 mmol) in THF (5 mL) at room temperature, and the mixture was heated at 80 °C for 9 d in a sealed tube to give a brown solution. After removal of the solvent, the residue was subject to

chromatographic separation ( $\text{SiO}_2$ , 300-400 mesh, *n*-hexane/ $\text{CH}_2\text{Cl}_2$  3:1), giving **11** as a white solid (80 mg, 59%). X-ray-quality crystals were obtained by recrystallization from acetone.  $^1\text{H}$  NMR (acetone- $d_6$ ):  $\delta$  8.08 (s, 2H, imidazolium NCH), 7.56 (t,  $J$  = 8.0 Hz, 2H, aromatic CH), 7.49 (d,  $J$  = 7.6 Hz, 2H, aromatic CH), 7.37 (m, 4H, aromatic CH), 7.12 (m, 3H, aromatic CH), 2.76 (m, 2H,  $\text{CH}(\text{CH}_3)_2$ ), 2.66 (m, 2H,  $\text{CH}(\text{CH}_3)_2$ ), 2.39 (m, 1H,  $\text{CH}_2$ ), 2.02 (m, 1H,  $\text{CH}_2$ ), 1.55 (m, 2H,  $\text{CH}_2$ ), 1.54 (d,  $J$  = 6.8 Hz, 6H,  $\text{CH}(\text{CH}_3)_2$ ), 1.38 (d,  $J$  = 6.8 Hz, 6H,  $\text{CH}(\text{CH}_3)_2$ ), 1.25 (d,  $J$  = 6.8 Hz, 6H,  $\text{CH}(\text{CH}_3)_2$ ), 1.16 (d,  $J$  = 6.8 Hz, 6H,  $\text{CH}(\text{CH}_3)_2$ ), 1.01 (m, 3H,  $\text{CH}_2$ ), 0.50 (m, 1H,  $\text{CH}_2$ ).  $^{13}\text{C}\{^1\text{H}\}$  NMR (acetone- $d_6$ ):  $\delta$  146.9, 146.4, 134.5, 133.9, 132.0, 127.5, 127.2, 127.1, 125.2, 125.0 ( $\text{C}_6\text{H}_5$  &  $\text{C}_6\text{H}_3$  & imidazolium NCH), 70.5 ( $\nu_{1/2}$  = 35 Hz), 33.0 ( $\nu_{1/2}$  = 33 Hz) (cage C), 42.6, 23.4, 22.0 ( $\text{CH}_2$ ), 26.4, 26.3, 22.6, 22.1 ( $\text{CH}(\text{CH}_3)_2$ ), the imidazolium NCN carbon was not observed.  $^{11}\text{B}$  NMR (acetone- $d_6$ ):  $\delta$  13.0 (s, 1B, BPh), -1.4 (d,  $J$  = 118 Hz, 1B), -2.8 (d,  $J$  = 58 Hz, 1B), -7.2 (d,  $J$  = 131 Hz, 2B), -13.5 (d,  $J$  = 150 Hz, 1B), -15.7 (d,  $J$  = 133 Hz, 2B), -19.3 (d,  $J$  = 133 Hz, 1B), -21.9 (d,  $J$  = 141 Hz, 1B) -36.7 (d,  $J$  = 150 Hz, 1B). IR (KBr,  $\text{cm}^{-1}$ ):  $\nu_{\text{BH}}$  2531 (vs). HRMS:  $m/z$  calcd for  $\text{C}_{39}\text{H}_{59}\text{B}_{11}\text{N}_2$   $[\text{M}]^+$ : 674.5774. Found: 674.5781. Anal. Calcd for  $\text{C}_{39}\text{H}_{59}\text{B}_{11}\text{N}_2$ : C, 69.41; H, 8.81; N, 4.15. Found: C, 69.09; H, 9.28; N, 3.92.

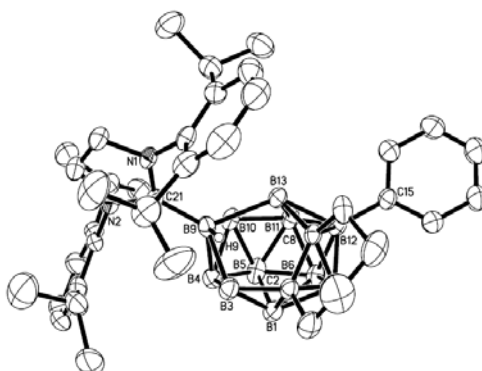

**Figure S7.** Molecular structure of 2,8-(CH<sub>2</sub>)<sub>4</sub>-9-(2'-{1',3'-[2'',6''-*i*-Pr<sub>2</sub>(C<sub>6</sub>H<sub>3</sub>)]<sub>2</sub>-1',3'-N<sub>2</sub>C<sub>3</sub>H<sub>2</sub>)-12-Ph-2,8-C<sub>2</sub>B<sub>11</sub>H<sub>11</sub> (**11**).

**Preparation of 2,8-(CH<sub>2</sub>)<sub>4</sub>-9-(2'-{1',3'-[2'',4'',6''-Me<sub>3</sub>(C<sub>6</sub>H<sub>3</sub>)]<sub>2</sub>-1',3'-N<sub>2</sub>C<sub>3</sub>H<sub>2</sub>})-12-Ph-2,8-C<sub>2</sub>B<sub>11</sub>H<sub>10</sub> (12).** A THF solution (5 mL) of 1,3-bis(2,4,6-trimethylphenyl)imidazol-2-ylidene (61 mg, 0.2 mmol) was slowly added to a stirring solution of 1,2-(CH<sub>2</sub>)<sub>4</sub>-3-Ph-1,2-C<sub>2</sub>B<sub>11</sub>H<sub>10</sub> (57 mg, 0.2 mmol) in THF (5 mL) at room temperature, and the mixture was heated at 80 °C for 3 d in a sealed tube to give a brown solution. After removal of the solvent, the residue was subject to chromatographic separation (SiO<sub>2</sub>, 300-400 mesh, *n*-hexane/CH<sub>2</sub>Cl<sub>2</sub> 1:3), giving **12** as a white solid (65 mg, 55%). <sup>1</sup>H NMR (acetone-*d*<sub>6</sub>): δ 7.84 (s, 2H, imidazolium NCH), 7.41 (m, 2H, aromatic CH), 7.15 (m, 5H, aromatic CH), 7.06 (s, 2H, aromatic CH), 2.39 (m, 1H, CH<sub>2</sub>), 2.34 (s, 6H, CH<sub>3</sub>), 2.30 (s, 6H, CH<sub>3</sub>), 2.13 (m, 1H, CH<sub>2</sub>), 2.09 (s, 6H, CH<sub>3</sub>), 1.61 (m, 1H, CH<sub>2</sub>), 1.34 (m, 1H, CH<sub>2</sub>), 1.06 (m, 3H, CH<sub>2</sub>), 0.33 (m, 1H, CH<sub>2</sub>). <sup>13</sup>C{<sup>1</sup>H} NMR (acetone-*d*<sub>6</sub>): δ 141.3, 137.2, 135.8, 134.4, 134.2, 130.4, 130.2, 127.5, 127.3, 125.9 (C<sub>6</sub>H<sub>5</sub> & C<sub>6</sub>H<sub>2</sub> & imidazolium NCH), 43.5, 23.2, 22.6 (CH<sub>2</sub>), 21.1, 18.4, 18.1 (CH<sub>3</sub>), the imidazolium NCN and cage C atoms were not observed. <sup>11</sup>B NMR (acetone-*d*<sub>6</sub>): δ 11.5 (s, 1B, BPh), -3.4 (d, *J* = 62 Hz, 2B), -4.0 (d, *J* = 115 Hz, 1B), -8.9 (d, *J* = 142 Hz, 2B), -14.5 (d, *J* = 174 Hz, 1B), -16.0 (d, *J* = 152 Hz, 1B), -17.0 (d, *J* = 131 Hz, 1B), -20.5 (d, *J* = 119 Hz, 1B), -22.9 (d, *J* = 152 Hz, 1B), -37.8 (d, *J* = 131 Hz, 1B). IR (KBr, cm<sup>-1</sup>): ν<sub>BH</sub> 2521 (vs). HRMS: *m/z* calcd for C<sub>33</sub>H<sub>47</sub>B<sub>11</sub>N<sub>2</sub> [M - H]<sup>+</sup>: 589.4769. Found: 589.4759. Anal. Calcd for C<sub>33</sub>H<sub>47</sub>B<sub>11</sub>N<sub>2</sub>: C, 67.10; H, 8.02; N, 4.74. Found: C, 67.28; H, 8.12; N, 4.38.

**Preparation of [1,2-CH(CH<sub>2</sub>)<sub>3</sub>-1,2-C<sub>2</sub>B<sub>11</sub>H<sub>11</sub>][1',3',4',5'-Me<sub>4</sub>-1',3'-N<sub>2</sub>C<sub>3</sub>H] (13).** To a stirring CH<sub>2</sub>Cl<sub>2</sub> (15 mL) solution of 1,2-(CH<sub>2</sub>)<sub>4</sub>-1,2-C<sub>2</sub>B<sub>11</sub>H<sub>11</sub> (105 mg, 0.50 mmol) was added a CH<sub>2</sub>Cl<sub>2</sub> solution (5 mL) of 1,3,4,5-tetramethylimidazol-2-ylidene (62 mg, 0.50 mmol) at room temperature. Removal of the solvent afforded **13** as a white solid (165 mg, 99%). <sup>1</sup>H NMR (CD<sub>2</sub>Cl<sub>2</sub>): δ 8.30 (s, 1H, NCHN), 5.82 (t, *J* = 4.8 Hz, 1H, CH), 3.75 (s, 6H, NCH<sub>3</sub>), 2.25 (s, 6H, CCH<sub>3</sub>), 2.18 (m, 2H,

CHCH<sub>2</sub>), 2.10 (m, 2H, CCH<sub>2</sub>), 1.58 (m, 2H, CH<sub>2</sub>CH<sub>2</sub>CH<sub>2</sub>). <sup>13</sup>C{<sup>1</sup>H} NMR (CD<sub>2</sub>Cl<sub>2</sub>): δ 152.0 (CH), 134.5 (NCHN), 128.3 (NCCH<sub>3</sub>), 79.2 (cage CCH), 52.9 (cage CCH<sub>2</sub>), 42.2 (CCH<sub>2</sub>), 34.4 (NCH<sub>3</sub>), 29.0 (CHCH<sub>2</sub>), 19.2 (CH<sub>2</sub>CH<sub>2</sub>CH<sub>2</sub>), 8.7 (CCH<sub>3</sub>). <sup>11</sup>B{<sup>1</sup>H} NMR (CD<sub>2</sub>Cl<sub>2</sub>): δ 6.3 (d, *J* = 138 Hz, 1B), -1.5 (d, *J* = 149 Hz, 5B), -21.8 (d, *J* = 136 Hz, 5B). IR (KBr, cm<sup>-1</sup>): ν<sub>BH</sub> 2530 (vs). Anal. Calcd for C<sub>13</sub>H<sub>31</sub>B<sub>11</sub>N<sub>2</sub>: C, 46.70; H, 9.35; N, 8.38. Found: C, 46.61; H, 9.03; N, 8.39.

**X-ray Structure Determination.** All single crystals were immersed in Paratone-N oil and sealed under nitrogen in thin-walled glass capillaries. Data were collected at 293 K on a Bruker SMART 1000 CCD diffractometer using Mo-Kα radiation. An empirical absorption correction was applied using the SADABS program.<sup>3</sup> All structures were solved by direct methods and subsequent Fourier difference techniques and refined anisotropically for all non-hydrogen atoms by full-matrix least-squares on *F*<sup>2</sup> using the SHELXTL program package.<sup>4</sup> All hydrogen atoms were geometrically fixed using the riding model.

CCDC 1032166-1032172 (**1**, **3** – **5**, **9** – **11**) contain the supplementary crystallographic data for this paper. These data can be obtained free of charge from The Cambridge Crystallographic Data Centre via [www.ccdc.cam.ac.uk/data\\_request/cif](http://www.ccdc.cam.ac.uk/data_request/cif).

## References

1. L. Deng, H.-S. Chan and Z. Xie, *J. Am. Chem. Soc.*, 2006, **128**, 5219.
2. F. Zheng, J. Zhang, X. Fu and Z. Xie, *Chem. Asian J.*, 2013, **8**, 1886.
3. G. M. Sheldrick, *SADABS, Program for Empirical Absorption Correction of Area Detector Data*, University of Göttingen, Germany, 1996.
4. G. M. Sheldrick, *SHELXTL 5.10 for Windows NT: Structure Determination Software Programs*. Bruker Analytical X-ray systems, Inc., Madison, WI, 1997.
